# Supplementary material
Source: Research Square preprint supplement (doi:10.21203/rs.3.rs-10044029/v1)
Supplement: Supplementary file 1 [file 47c626798d2cf85f3a274939.docx]

**Bio-Efficacy of Seed and Leaf Extracts of *Azadirachta indica* (neem) and *Jatropha curcas* (physic nut) against Fall Armyworm (*Spodoptera frugiperda*) Infestation in Maize Fields**

**Mayaki Alhaji Cece1***, **Israel Kayode Olayemi2, Muhammadu Tajudeen Salaudeen3, Azubuike Christian Ukubuiwe2 and Ibrahim Maikudi Salihu4**

***Corresponding author**

**Mayaki Alhaji, Cece1***

1*Department of Biological Sciences, Federal Polytechnic, P.M.B. 55, Bida, Nigeria Email: [**mayaki.cece@fedpolybida.edu.ng**](mailto:mayaki.cece@fedpolybida.edu.ng) **Phone no. 08066786035 Orcid: 0009-0004-7047-6597**

**2**Entomology unit, Department of Animal Biology, Federal University of Technology Minna, Nigeria **Email:** [**israel.olayemi@futminna.edu.ng**](mailto:israel.olayemi@futminna.edu.ng) **Phone no: 07066894091 Orcid: 0000-0001-7116-0720**

**3**Department of Crop Production Federal University of Technology Minna, Nigeria Email: [**mtsalaudeen@futminna.edu.ng**](mailto:mtsalaudeen@futminna.edu.ng) **Phone no: 08063330183 Orcid: 0000-0003-1196-4254**

2Entomology unit, Department of Animal Biology Federal University of Technology Minna, Nigeria **Email:** [**a.ukubuikwe@futminna.edu.ng**](mailto:a.ukubuikwe@futminna.edu.ng) **Phone no. 08066148698 Orcid: 0000.0001-7116-0720**

**4**Department of Basic Science and General Studies African Aviation and Aerospace University Abuja, Nigeria Email: [ismaikudi@aaau.edu.ng](mailto:ismaikudi@aaau.edu.ng)

**Phone no. 08035963534** **Orcid: 0000-0002-2356-9238**

**Context and importance of the submitted work**

The present study addresses the increasing challenge posed by the invasive Fall armyworm (*Spodoptera frugiperda*), a descructive agricultural pest that significantly threatens maize production throughout Africa and other tropical regions. The research is particularly valuable because it investigates the potential of locally available plant species, *Azadirachta indica and Jatropha curcas,* as sustainable and eco-friendly alternatives to synthetic insecticides, The findings enhance our understanding of insect-plant interactions, the insecticidal properties of botanical extracts, and environmentally responsible pest management approaches,. Furthermore, the study contributes to food security efforts by identifying effective strategies for reducing maize yield losses while minimizing the environmental and ecological impacts associated with excessive use of convectional chemical pesticides.

**Manuscript Appropriate for the *Journal of basic and Applied Zoology*** The study is highly consistent with the aims and scope of the journal of Basic and Applied Zoology for several reasons. First, it examines the biology and management of the economically significant insect pest *Spodoptera frugiperda*, which is of considerable importance in agricultural systems. Second, it contributes applied zoological knowledge by evaluating plant-derived bioactive compounds as potential alternatives for insect pest management. Third, the research investigates the responses of insects to botanical treatments, thereby enhancing understanding of insect ecology, behavior, and toxicology. Fourth, the findings provide practical insights relevant to agricultural zoology, integrated pest management and sustainable crop protection practices and finally, the study advances both fundamental and applied aspects of entomological research, which are key areas of interest to the journal. Overall, the manuscript makes meaningful scientific and practical contributions that align with the journal,s emphasis on zoological research and its applications in agriculture, pest management, and environmental sustainability,

**Declarations** **Ethics approval and consent to participate**  Not applicable **Consent for publication**  All the authors agreed that the submitted work has not been published previously, that the work is not under consideration for publication elsewhere and that all authors agreed to the publication of this work

**Data availability and materials** All data supporting the findings of this study are available within the paper **Conflict of interest**  All the authors has agreed that, there is no conflict of interest, **Funding** No financial assistance was received from individual or organization **Authors contributions.** Cece, M. A: collection of the data,, writing the first draft, Olayemi, I. K: Concentualized the idea, methodology, validation, Salaudeen, M. T: Supervision, writing original draft, writing review, Ukubuiwe, A. C: writing review and editing, Salihu, I. M: Conduct data analysis and revised second draft.

**Acknowledgements** The authors wish to acknowledge all the students that assisted in data collection and the management of the Department of Animal Biology, Federal University of Technology, Minna, Nigeria for providing laboratory space where the identification of FAW were conducted.
